# Supplementary material for: Entrapment of the Fastest Known Carbonic Anhydrase with Biomimetic Silica and Its Application for CO2 Sequestration
Source: MDPI journal article supplement (doi:10.3390/polym13152452), 2021-07-26
Supplement: s1 [file s1]

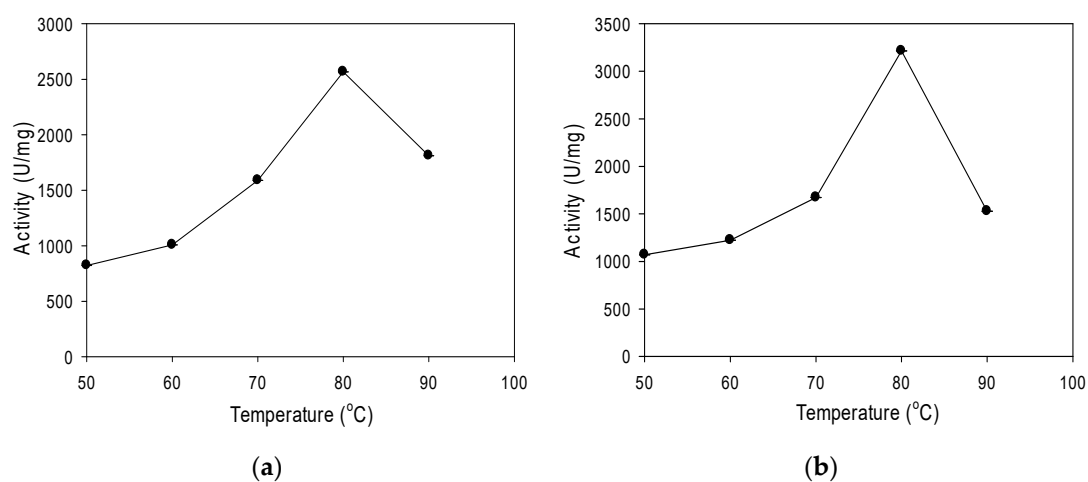

**Figure S1.** Effect of temperature on activity. (a) R5-SazCA; (b) R5-SazCA-SP.

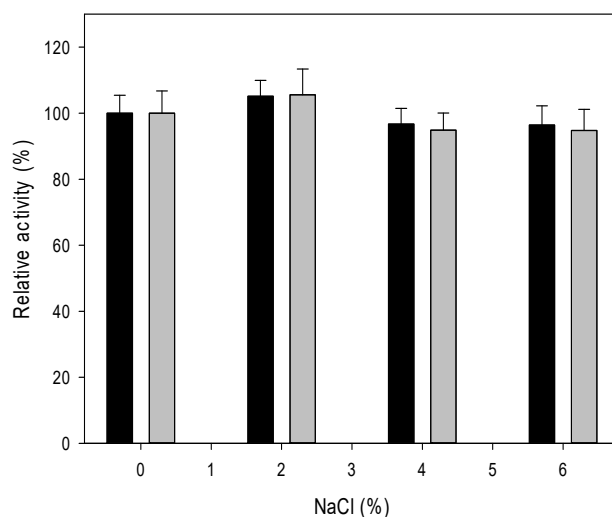

**Figure S2.** Salinity tolerance of R5-SazCA and R5-SazCA-SP. Black bar: R5-SazCA; grey bar: R5-SazCA-SP. The activities in the absence of NaCl were set as 100%. The salinity tolerance was examined by incubating the enzyme with 2%, 4% and 6% (w/v) of NaCl supplemented in storage buffer for 30 min followed by assaying the CO<sub>2</sub> hydratase activity.
